# Supplementary material for: Multidimensional assessment of alveolar T cells in critically ill patients
Source: JCI journal article supplement (doi:10.1172/jci.insight.123287), 2018-09-05
Supplement: sd1 [file 1]

## Supplemental Data

### Multi-dimensional assessment of alveolar T cells in critically ill patients

James M. Walter<sup>1</sup>, Kathryn A. Helmin<sup>1</sup>, Hiam Abdala-Valencia<sup>1</sup>, Richard G. Wunderink<sup>1</sup>,  
Benjamin D. Singer<sup>1,2,3,\*</sup>

<sup>1</sup>Division of Pulmonary and Critical Care Medicine, Department of Medicine  
Northwestern University Feinberg School of Medicine  
Chicago, IL 60611, USA

<sup>2</sup>Department of Biochemistry and Molecular Genetics  
Northwestern University Feinberg School of Medicine  
Chicago, IL 60611, USA

<sup>3</sup>Simpson Querrey Center for Epigenetics  
Northwestern University Feinberg School of Medicine  
Chicago, IL 60611, USA

\*Name and address of corresponding author:

Benjamin D. Singer, MD  
Division of Pulmonary and Critical Care Medicine, Department of Medicine  
Department of Biochemistry and Molecular Genetics  
Simpson Querrey Center for Epigenetics  
Northwestern University Feinberg School of Medicine  
240 E. Huron Street, Suite M-300  
Chicago, IL 60611, USA  
E-mail: [benjamin-singer@northwestern.edu](mailto:benjamin-singer@northwestern.edu)  
Phone: 312-503-4494  
Fax: 312-503-0411

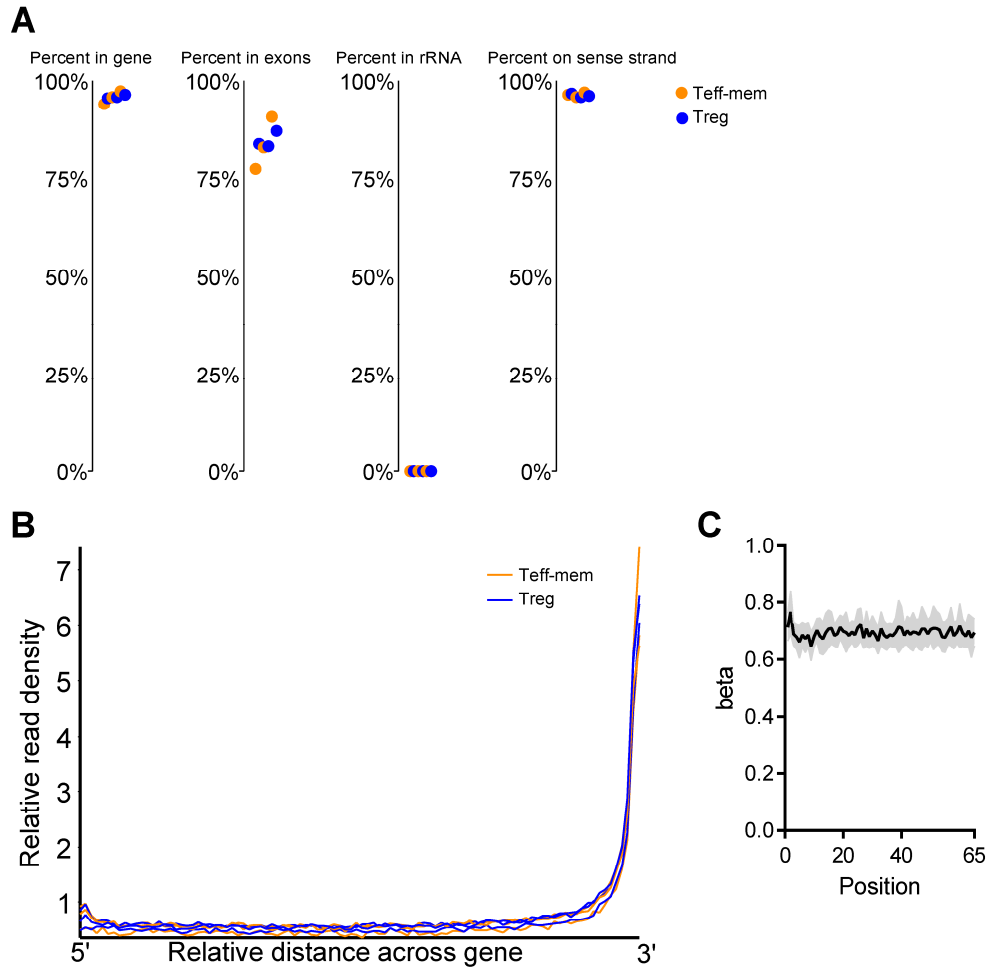

**Supplemental Figure 1.** RNA-sequencing and modified reduced representation bisulfite sequencing quality indicators. **(A)** RNA-sequencing mapping statistics including the percentage of reads mapping to a gene, exon, ribosomal RNA (rRNA), and sense strand. **(B)** Relative trend plot of read density across genes from 5' → 3'. **(C)** M-bias plot of average beta (CpG methylation) across the length of trimmed reads from 5' → 3'. The band shows SD for each read position. Data represent 3 replicates for each cell type obtained from 3 individual participants.

**Supplemental Table 1.** Coordinates of mapped Treg cell-specific super-enhancer elements. Genes overlapping within 5 kb are annotated. [provided as a tab-delimited file]

**Supplemental Table 2.** Reagents and cytometer setup. BB, Brilliant Blue; PE, phycoerythrin; APC, allophycocyanin; BV, Brilliant Violet; BUV, Brilliant UltraViolet.

| Antigen                         | Conjugate    | Clone   | Company        | Catalog number | Volume ( $\mu\text{L}$ ) added to stain cells in 100 $\mu\text{L}$ | Laser line (color)    | Bandpass filter | Longpass filter |
|---------------------------------|--------------|---------|----------------|----------------|--------------------------------------------------------------------|-----------------------|-----------------|-----------------|
| <b>CD45RA</b>                   | BB515        | HI100   | BD Biosciences | 564552         | 5.0                                                                | 488 nm (blue)         | 530/30          | 505LP           |
| <b>CD127</b>                    | PE-CF594     | HIL-7R  | BD Biosciences | 562397         | 5.0                                                                | 561 nm (yellow-green) | 610/20          | 595LP           |
| <b>CD3<math>\epsilon</math></b> | APCeFluor780 | SK7     | eBioscience    | 47-0036-42     | 5.0                                                                | 637 nm (red)          | 780/60          | 750LP           |
| <b>CD62L</b>                    | BV421        | DREG-56 | BD Biosciences | 563862         | 5.0                                                                | 405 nm (violet)       | 450/50          | -               |
| <b>Live-dead marker</b>         | eFluor506    | -       | eBioscience    | 65-0866-14     | Per manufacturer's recommendations                                 | 405 nm (violet)       | 525/50          | 505LP           |
| <b>CD4</b>                      | BUV395       | RPA-T4  | BD Biosciences | 564724         | 2.5                                                                | 355 nm (UV)           | 379/28          | -               |

**Supplemental Video 1.** Two respiratory therapists perform a non-bronchoscopic BAL (NBBAL) procedure on an intubated, mechanically ventilated patient with suspected pneumonia.
